# Supplementary material
Source: PubMed Central journal article supplement (PMC6842076)
Supplement: NIHMS1529058-supplement-12350_2019_1724_MOESM1_ESM.pdf [file NIHMS1529058-supplement-12350_2019_1724_MOESM1_ESM.pdf]

## Supplemental Material

### **FDG PET imaging of vascular inflammation in post-traumatic stress disorder: a pilot case-control study**

Jakub Toczek<sup>1,2</sup>, Ansel T. Hillmer<sup>3,4,5</sup>, Jinah Han<sup>1,2</sup>, Chi Liu<sup>3,4</sup>, Dana Peters<sup>3</sup>, Hamed Emami<sup>1</sup>, Jing Wu<sup>3,4</sup>,  
Irina Esterlis<sup>2,4,5</sup>, Kelly P. Cosgrove<sup>3,4,5</sup> and Mehran M. Sadeghi<sup>1,2</sup>

1. Cardiovascular Molecular Imaging Laboratory, Section of Cardiovascular Medicine and Yale Cardiovascular Research Center, Yale University School of Medicine, New Haven, CT (USA);
2. Veterans Affairs Connecticut Healthcare System, West Haven, CT (USA);
3. Department of Radiology and Biomedical Imaging, Yale University School of Medicine, New Haven, CT, United States
4. Yale PET Center, Yale University School of Medicine, New Haven, CT, United States
5. Department of Psychiatry, Yale University School of Medicine, New Haven, CT, United States

Address for correspondence:

Mehran M. Sadeghi, M.D.

Yale Cardiovascular Research Center

300 George Street, #770G

New Haven, CT 06511

Fax: 203-937 3884

Phone: 203-737 6954

[mehran.sadeghi@yale.edu](mailto:mehran.sadeghi@yale.edu)

**Table S1.** FDG uptake in different organs.

|             | Unit                       | Control (n = 7) | PTSD (n = 8) | <i>p</i> |
|-------------|----------------------------|-----------------|--------------|----------|
| Aortic wall | SUVmax                     | 3.56 ± 0.33     | 3.3 ± 0.35   | 0.16     |
|             | TBR                        | 2.40 ± 0.29     | 2.34 ± 0.29  | 0.69     |
| Bone marrow | SUVmax                     | 4.65 ± 0.93     | 4.13 ± 0.66  | 0.24     |
|             | TBR                        | 3.11 ± 0.5      | 2.92 ± 0.48  | 0.48     |
| Spleen      | SUVmax                     | 3.27 ± 0.37     | 3.00 ± 0.45  | 0.21     |
|             | TBR                        | 2.19 ± 0.18     | 2.11 ± 0.21  | 0.41     |
| Amygdala    | SUV                        | 7.07 ± 0.81     | 7.01 ± 1.18  | 0.91     |
|             | TBR                        | 4.75 ± 0.60     | 4.95 ± 0.75  | 0.59     |
|             | SUV ratio to temporal lobe | 0.71 ± 0.04     | 0.72 ± 0.04  | 0.72     |

Values are mean ± SD.

**Table S2:** Pearson correlation coefficient (*R*) and the corresponding p-value (*P*) of the correlates of FDG uptake in arterial wall, bone marrow, spleen and amygdala expressed as TBR.

|             |          | Bone Marrow | Spleen           | Amygdala        |
|-------------|----------|-------------|------------------|-----------------|
| Aortic wall | <i>R</i> | 0.45        | 0.40             | 0.34            |
|             | <i>P</i> | 0.10        | 0.14             | 0.22            |
| Bone Marrow | <i>R</i> |             | 0.81             | 0.70            |
|             | <i>P</i> |             | <b>&lt;0.001</b> | <b>&lt;0.01</b> |
| Spleen      | <i>R</i> |             |                  | 0.72            |
|             | <i>P</i> |             |                  | <b>&lt;0.01</b> |
